# Supplementary material for: Molecular genetics of naringenin biosynthesis, a typical plant secondary metabolite produced by Streptomyces clavuligerus
Source: PubMed Central journal article supplement (PMC4640377; doi:10.1186/s12934-015-0373-7), 2015-11-09
Supplement: 12934_2015_373_MOESM1_ESM.pdf [file 12934_2015_373_MOESM1_ESM.pdf]

**A**

|                             | <u>132</u> to <u>146</u> | <u>181</u> to <u>197</u>    | <u>266</u> to <u>278</u> | <u>295</u> to <u>307</u>        |
|-----------------------------|--------------------------|-----------------------------|--------------------------|---------------------------------|
| <i>S. clavuligerus</i> 5492 | PIAQLG <b>C</b> AAGGAAVN | SLLSNGL <b>F</b> GDGIAAAVV  | FYII <b>H</b> AGGPRILD   | RATL <b>T</b> EYGN <b>I</b> ASA |
| <i>S. coelicolor</i> 1206   | PIAQLG <b>C</b> AAGGAAIN | SLLCNGL <b>F</b> GDGIAAAVV  | FYIV <b>H</b> AGGPRILD   | RATL <b>T</b> EYGN <b>I</b> ASA |
| <i>S. avermitilis</i> 7131  | PIAQLG <b>C</b> AAGGSAIN | SLLSNGL <b>F</b> GDGIAAAAAR | FYII <b>H</b> AGGPRILD   | RATL <b>T</b> EYGN <b>I</b> ASA |
| <i>S. ven</i> 5367          | PIAQLG <b>C</b> AAGGAAIN | SLLSNGL <b>F</b> GDVAAAIV   | FYII <b>H</b> AGGPRILD   | RATL <b>T</b> EYGN <b>I</b> ASA |
| <i>S. griseus</i> 6620      | PIAQLG <b>C</b> AAGGAAIN | SLLSNGL <b>F</b> GDALSAVV   | FFIV <b>H</b> AGGPRILD   | RATL <b>T</b> ERGN <b>I</b> ASS |
|                             | * * * * *                | ** * * * *                  | * * * * *                | * * * * *                       |
| Glycine                     | MMYQQG <b>C</b> FAGGTVLR | SLVGQAL <b>F</b> GDGAAAVIV  | FWIA <b>H</b> PGGPAILD   | RHVLSEYGN <b>M</b> SSA          |
| Medicago                    | MMYQQG <b>C</b> FAGGTVLR | SLVGQAL <b>F</b> GDGAAALIV  | FWIA <b>H</b> PGGPAILD   | REVLSEYGN <b>M</b> SSA          |
| Citrus                      | MMYQQG <b>C</b> FAGGTVLR | SLVGQAL <b>F</b> GDGAAAVIV  | FWIA <b>H</b> PGGPAILD   | RQVLSEYGN <b>M</b> PSA          |
| Arabidopsis                 | MMYQQG <b>C</b> FAGGTVLR | SLVGQAL <b>F</b> GDGAAALIV  | FWIA <b>H</b> PGGPAILD   | RHVLSEYGN <b>M</b> SSA          |
| Zea Mays                    | MMYQQG <b>C</b> FAGGTVLR | SLVGQAL <b>F</b> GDGAAAVVV  | FWVA <b>H</b> PGGPAILD   | RHVLSEYGN <b>M</b> SSA          |
|                             | 138                      | 188                         | 270                      | 303                             |

**B**

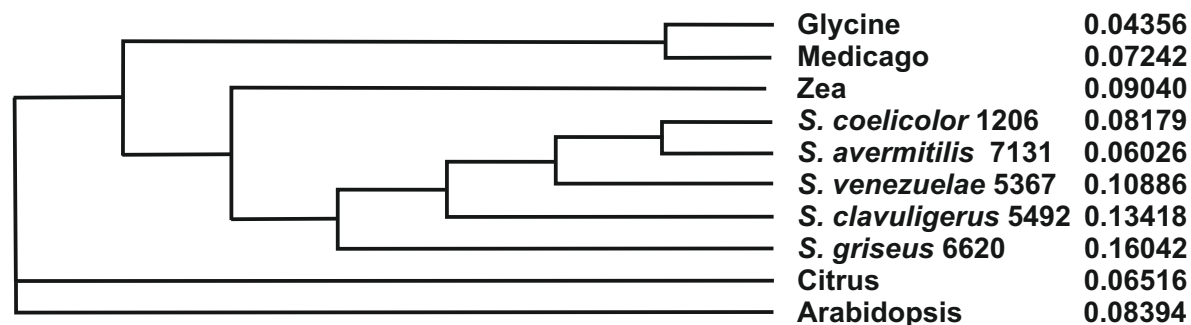

Supplementary Material

Figure S1. A) Conserved sequences around the key amino acids located in chalcone synthases active center. The numbers given in the sequence correspond to *S. clavuligerus* Ncs, where the key amino acids are Cys<sup>138</sup>, Phe<sup>188</sup>, His<sup>270</sup> and Asn<sup>303</sup>.

B) Phylogenetic tree of plant and *Streptomyces* chalcone synthases. The origin of the sequences used is indicated at the right side. Numbers at the far right side correspond to the genetic distance index.
